# Supplementary material for: A GO-assisted method for the preparation of ultrathin covalent organic framework membranes for gas separation
Source: Royal Society of Chemistry journal article supplement (doi:10.1039/c6ta04579k), 2016-01-01
Supplement: c6ta04579k1.pdf [file c6ta04579k1.pdf]

## Electronic Supplementary Information

### **A GO-assisted method for the preparation of ultrathin covalent organic framework membranes for gas separation**

*Yunpan Ying, Dahuan Liu<sup>\*</sup>, Jing Ma, Minman Tong, Weixin Zhang, Hongliang Huang,  
Qingyuan Yang and Chongli Zhong<sup>\*</sup>*

State Key Laboratory of Organic-Inorganic Composites and Beijing Advanced Innovation  
Center for Soft Matter Science and Engineering,

Beijing University of Chemical Technology, Beijing 100029, China

E-mail: liudh@mail.buct.edu.cn; zhongcl@mail.buct.edu.cn

# **Contents**

1. Materials
2. Preparation of GO nanosheets dispersion liquid
3. Characterization Results
4. Gas permeation experiment
5. Effect of GO amount on the separation performance
6. Effect of temperature on the separation performance
7. Thermal stability and durability
8. Comparison with other membranes

## 1. Materials

ZnCl<sub>2</sub> (98 %) and 1, 4-dicyanobenzene (DCB, 98 %) were purchased from J&K. Single-layered GO powder prepared by modified Hummer's method was purchased from Nanjing JCNANO Tech Co., Ltd, China. Isopore cellulos acetate supports (with average pore size of about 100 nm) were purchased from Millipore. Ampoules (10 ml) were purchased from Synthware Glass Instrument Co., Ltd. H<sub>2</sub>, CO<sub>2</sub> with purity > 99.999 % were purchased from Beiyang Special Gases Co., Ltd. Before usage, ZnCl<sub>2</sub> was dried in vacuum at 423 K overnight and DCB was purified by sublimation.

## 2. Preparation of GO nanosheets dispersion liquid

GO nanosheets dispersion liquid was obtained by ultra-sonication of GO powder in water and the supernatant was taken out after being centrifuged for 0.5 h at 10000 rpm.

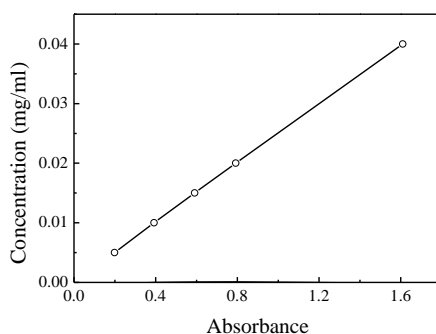

**Fig. S1** The linear fit relationship between UV absorbance of the standard GO dispersions and their concentrations.

The concentration of the as-prepared GO dispersion was measured by UV-vis (TU-1901, Beijing general instrument Co., Ltd) with a pre-calibrated curve of GO concentration vs. absorption at about 225 nm wavelength, as shown in Fig. S1. From the linear fit diagram, we can obtain GO nanosheets dispersion with concentration of about 0.02 mg/ml.

### 3. Membranes Preparation

In a typical membrane preparation process, 25 ml of CTF-1 nanosheets dispersion liquid and 0.5 ml of GO nanosheets dispersion liquid were mixed ultrasonically for 1 h. The CTF-1 membrane was obtained by layer-by-layer restacking of the mixed nanosheets dispersion liquid onto isopore cellulos acetate support by a vacuum filtration system. Then the membranes were dried at room temperature for one day and further dried under vacuum at 313 K for 24 h, which were used for the following characterizations and gas permeation test. Membranes containing different amount of CTF-1 and GO nanosheets were prepared by the same method by controlling the amount of dispersion liquids. A schematic of the fabrication steps is shown in Fig. 1b.

### 4. Characterization Results

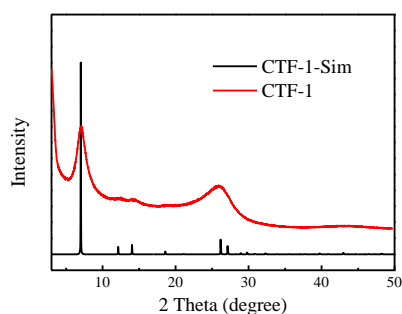

**Fig. S2** PXR D pattern of prepared CTF-1 and the comparison with the simulated pattern.

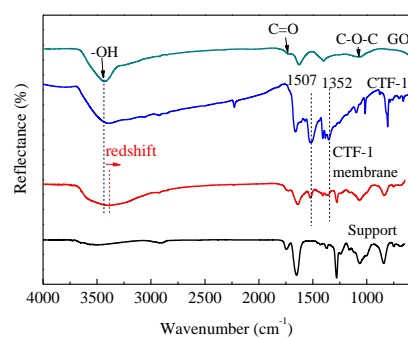

**Fig. S3** FTIR of CTF-1 nanosheets membrane, CTF-1 powder, GO and bare support.

The absorption bands at  $1352\text{ cm}^{-1}$  and  $1507\text{ cm}^{-1}$  in FTIR (Fig. S3) points to the presence of triazine rings, indicating that the chemical structure of CTF-1 nanosheets remains unchanged during the restacking process. The -OH peak at around  $3400\text{ cm}^{-1}$  in membranes has a slight shift ( $40\text{ cm}^{-1}$ ) compared to that in GO nanosheets, demonstrating the change of -OH groups due to the interaction between GO and support.<sup>2,3</sup>

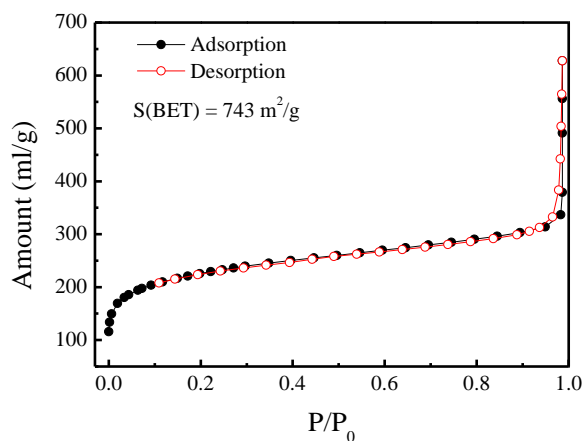

**Fig. S4**  $\text{N}_2$  adsorption-desorption isotherm at 77 K and BET surface area of CTF-1 powder.

**Table S1.** Elemental analyses of CTF-1 powder

| Name                           | C (wt %) | N (wt %) | H (wt %) |
|--------------------------------|----------|----------|----------|
| CTF-1 as reported <sup>1</sup> | 72.8     | 19.30    | 3.19     |
| CTF-1 as calculated            | 75.0     | 21.86    | 3.15     |
| CTF-1 in this work             | 73.2     | 18.88    | 3.28     |

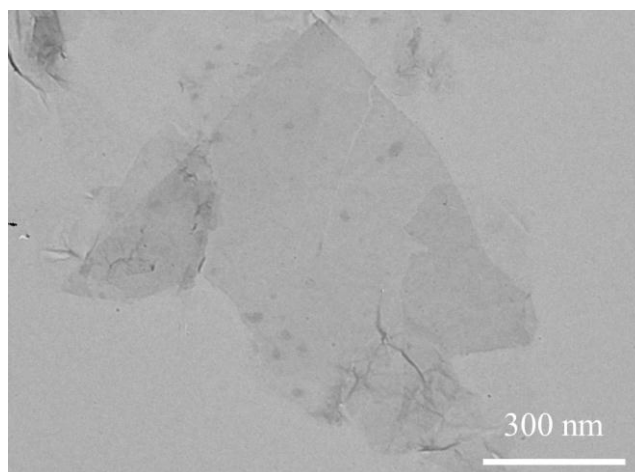

**Fig. S5** TEM of GO nanosheets.

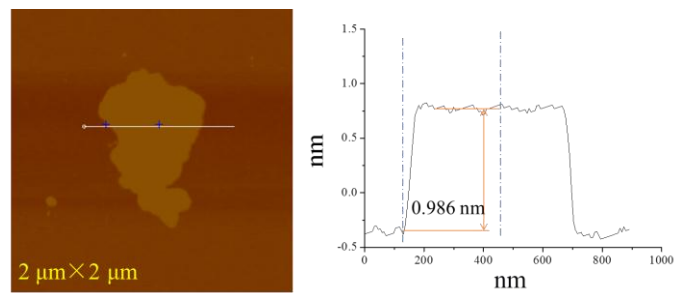

**Fig. S6** AFM image and the corresponding height line of GO nanosheets.

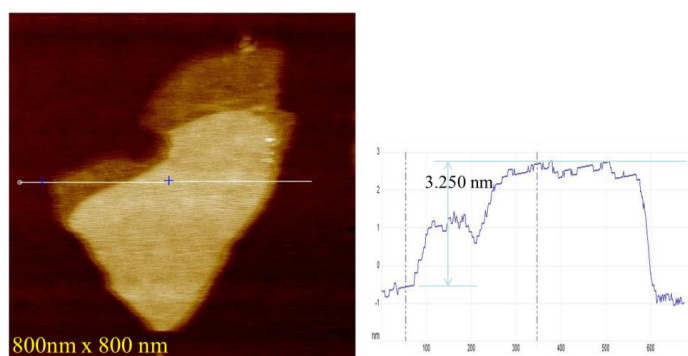

**Fig. S7** AFM of the mixed CTF-1 and GO nanosheets.

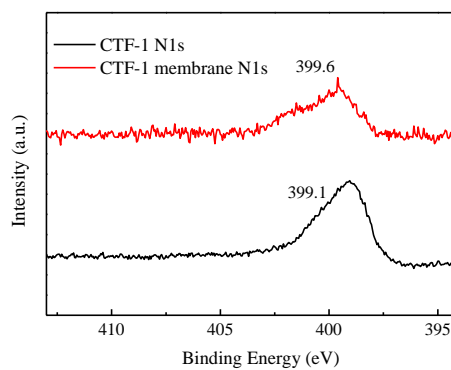

**Fig. S8** XPS N1s spectra of the prepared 100-nm-thick CTF-1 membrane and CTF-1 powder.

**Table S2.** XPS data of CTF-1 powder and CTF-1 membrane

| Elements | CTF-1 (eV) | CTF-1 membrane (eV) |
|----------|------------|---------------------|
| N1s      | 399.1      | 399.6               |

XPS characterization for CTF-1 powder and CTF-1 membrane can indicate the interaction between GO and the N atoms of CTF-1. The N1s component peaks shift from 399.1(C=N, C-N) to 399.6 eV. This result showed a decreased electron cloud density of N atoms, suggesting that the N atoms of CTF-1 could form hydrogen bonds with the H atoms of GO.<sup>4,5</sup>

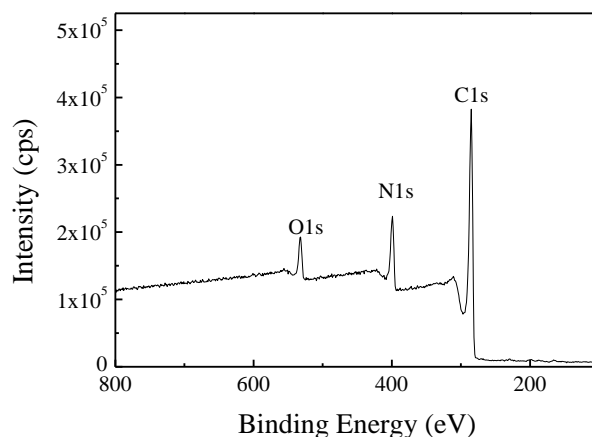

**Fig. S9** XPS spectra of the prepared 100-nm-thick CTF-1 nanosheets membrane.

According to the XPS analysis in Fig. S6 and Table S3, we can find that C/N ratio in the membrane surface (5.86) is higher than that (3.89) in the CTF-1 powder according the elements analysis as displayed in Table S1. This indicates the presence of GO nanosheets on the membrane surface.

**Table S3.** Elements weight percent analysis result from the XPS spectra.

| Elements           | C     | N     | O    |
|--------------------|-------|-------|------|
| Weight percent (%) | 80.69 | 13.78 | 5.53 |

## 5. Effect of GO amount on the separation performance

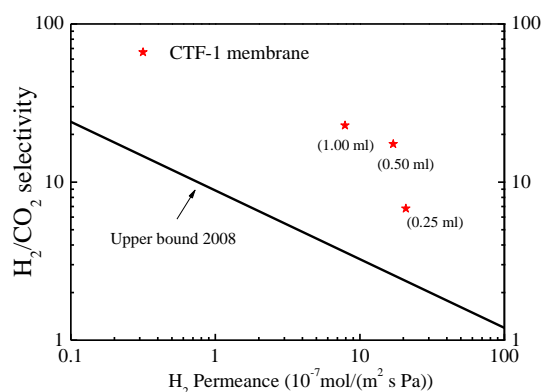

**Fig. S10** Gas separation performance of CTF-1 membrane prepared by 25 ml of CTF-1 dispersion liquid and different amounts of GO dispersion liquid.

In order to determine the effect of the amount of GO in the membrane on the separation performance, we added different amounts of GO dispersion liquid (0.25 ml, 1.00 ml) into 25 ml of CTF-1 nanosheets dispersion liquid. Gas permeation experimental results (Fig. S8) show that when we use 0.25 ml of GO dispersion liquid the separation selectivity was very low and permeance was high. It can be concluded that this membrane has too many defects or voids which may induce the leak of gases. The balanced separation performances (both permeance and selectivity) become better with the increase of the GO dispersion liquid amount. While the H<sub>2</sub> permeance decreases to  $7.9 \times 10^{-7}$  mol/(m<sup>2</sup>s Pa) though with a slightly improvement in selectivity due to the impenetrability feature and the possible stacking of GO nanosheets. The farther parallel distance away from the upper bound (2008),<sup>6</sup> the better gas separation performance. Taking these in mind, we determined that the volume ratio of CTF-1 nanosheets dispersion liquid and GO nanosheets dispersion liquid was 50:1.

## 6. Effect of temperature on the separation performance

In order to study the effect of temperature on the separation performance, we conducted the gas permeation test at different temperatures (298 K, 313 K and 323 K) by taking the 100-



nm membrane as an example. From the results as shown in Fig. S11, it can be seen that when the permeation temperature was increased from 298 K to 323 K at 3 bars, the H<sub>2</sub> permeance increases from  $1.7 \times 10^{-6}$  mol/m<sup>2</sup>s Pa to  $2.8 \times 10^{-6}$  mol/m<sup>2</sup>s Pa, while the H<sub>2</sub>/CO<sub>2</sub> selectivity decreases from 17.4 to 12.4. This phenomenon may be attributed to the interplay of adsorption and diffusion of H<sub>2</sub> and CO<sub>2</sub> in the CTF-1 membrane. The dependence of gas permeance on temperature is mainly depended on the relative values of activation energy for diffusion and exothermic heat of adsorption. Thus, the possible reason for the decrease of selectivity is the differences in the relative values of these two properties for H<sub>2</sub> and CO<sub>2</sub> with the increase of temperature. Similar tendency of temperature has been also found in other membranes<sup>7-11</sup>.

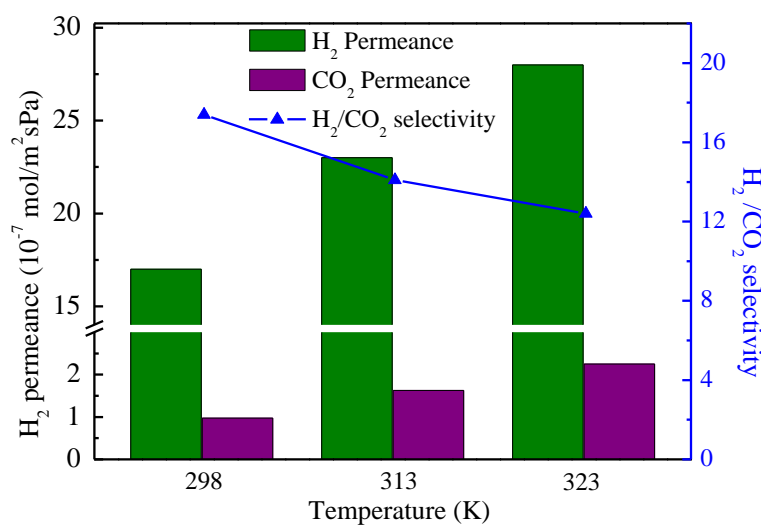

**Fig. S11** Gas permeance (left-axis) and H<sub>2</sub>/CO<sub>2</sub> selectivity (right-axis) as a function of temperature.

## 7. Thermal stability and durability

Thermal gravimetric analysis (TGA) of both the CTF-1 ultrathin membrane and bare support were conducted to study the thermal stability, as shown in Fig. S12. The obvious weight loss occurs at 430 K with 80 % of weight loss in the range of 430 K to 600 K, mainly

attributing to the collapse of cellulosic acetate support. Another stage of weight loss (about 12 %) is observed in the range of 600 K to 1200 K due to the collapse of CTF-1.

In order to check the durability of the membranes, we performed the gas permeation test of the 100-nm membrane up to 120 hours at 298 K and 323 K. As shown in Fig. S13, after a few hours for stabilization, the permeance and the  $H_2/CO_2$  selectivity remain almost unchanged during the following test period, indicating the stability of these data.

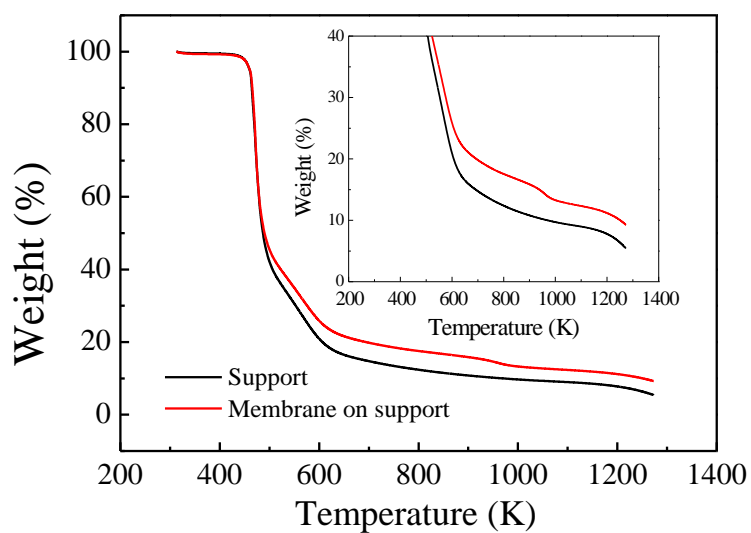

**Fig. S12** TGA curves of the membrane and support.

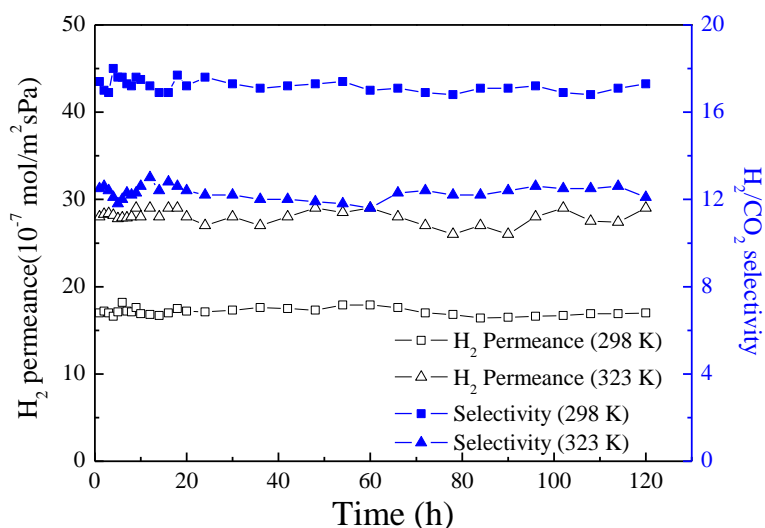

**Fig. S13** Evolution of the gas permeance (left-axis) and H<sub>2</sub>/CO<sub>2</sub> selectivity (right-axis) of the membrane.

## 8. Comparison with other membranes

**Table S4.** H<sub>2</sub>/CO<sub>2</sub> separation performance in comparison to other membranes in literature.

| Membranes                                             | Thickness (nm) | Permeance (10 <sup>-7</sup> mol/(m <sup>2</sup> s Pa)) | Permeability (Barrers) | Selectivity | Reference |
|-------------------------------------------------------|----------------|--------------------------------------------------------|------------------------|-------------|-----------|
| ZIF-8                                                 | 6000           | 2.02                                                   | -                      | 5.8         | 12        |
| ZIF-7                                                 | 1500           | 0.8                                                    | -                      | 6.7         | 13        |
| NH <sub>2</sub> -MIL-53(Al)                           | 15000          | 19.85                                                  | -                      | 30.9        | 14        |
| CAU-1                                                 | 4000           | 1.08                                                   | -                      | 12.34       | 15        |
| HKUST-1                                               | 60000          | 10.6                                                   | -                      | 6.84        | 16        |
| ZIF-8@GO                                              | -              | 1.27                                                   | -                      | 14.9        | 17        |
| ZIF-8/GO                                              | 100            | 0.546                                                  | -                      | 1.6         | 18        |
| CNT@IL/ZIF-9                                          | 30000          | 5.45                                                   | -                      | 40.04       | 19        |
| Zn <sub>2</sub> (bim) <sub>4</sub> nanosheet membrane | -              | 9.16                                                   | -                      | 291         | 20        |
|                                                       | 17             | 91.9                                                   | -                      | 3.4         |           |
| MoS <sub>2</sub>                                      | 35             | 23.6                                                   | -                      | 3.7         | 21        |
|                                                       | 60             | 8.19                                                   | -                      | 4.4         |           |
| Zeolite composite                                     | 5000           | 0.78                                                   | -                      | 23          | 22        |

| membrane          |           |       |       |      |           |
|-------------------|-----------|-------|-------|------|-----------|
| ZIF-8/6FDA-Durene | 10000     | 0.095 | 283.5 | 12   | 23        |
| ZIF-7-PBI         | -         | -     | 26.2  | 14.9 | 24        |
| ZIF-8-PBI         | -         | -     | 105.4 | 12.3 | 25        |
| GO                | 9.0       | 1     | -     | 3400 | 7         |
| GO                | 4000-6000 | 0.117 | -     | 30   | 26        |
| EFDA-GO           | 1000      | 4.017 | 1200  | 29   | 27        |
|                   | 100       | 17.0  | 507.8 | 17.4 |           |
| CTF-1 membrane    | 210       | 11.6  | 727.6 | 19.6 | This work |
|                   | 290       | 8.6   | 744.9 | 22.3 |           |

## References

- [1] P. Kuhn, M. Antonietti, A. Thomas, *Angew. Chem. Int. Ed.*, 2008, **47**, 3450.
- [2] M. Rozenberg, A. Loewenschuss, Y. Marcus, *Phys. Chem. Chem. Phys.*, 2000, **2**, 2699.
- [3] J. Shen, G. Liu, K. Huang, W. Jin, K.R. Lee, N. Xu, *Angew. Chem. Int. Ed.*, 2015, **54**, 578.
- [4] N. I. Kovtyukhova, T. E. Mallouk, L. Pan, E. C. Dickey, *J. Am. Chem. Soc.*, 2003, **125**, 9761.
- [5] M. Yoonessi, Y. Shi, D. A. Scheiman, M. Lebron-Colon, D. M. Tigelaar, R. A. Weiss, M. A. Meador, *ACS Nano*, 2012, **6**, 7644.
- [6] L. M. Robeson, *J. Membr. Sci.*, 2008, **320**, 390.
- [7] H. Li, Z. Song, X. Zhang, Y. Huang, S. Li, Y. Mao, H. J. Ploehn, Y. Bao, M. Yu, *Science*, 2013, **342**, 95.
- [8] C. Zhang, Y. Xiao, D. Liu, Q. Yang, C. Zhong, *Chem. Commun.*, 2013, **49**, 600.
- [9] N. Wang, A. Mundstock, Y. Liu, A. Huang, J. Caro, *Chem. Eng. Sci.*, 2015, **124**, 27.
- [10] Z. Zhao, X. Ma, Z. Li, Y. S. Lin, *J. Membr. Sci.*, 2011, **382**, 82.
- [11] M. Sadrzadeh, K. Shahidi, T. Mohammadi, *J. Membr. Sci.*, 2009, **342**, 327.
- [12] X. Zhang, Y. Liu, S. Li, L. Kong, H. Liu, Y. Li, W. Han, K. L. Yeung, W. Zhu, W. Yang, J. Qiu, *Chem. Mater.*, 2014, **26**, 1975.
- [13] Y. S. Li, F. Liang, H. Bux, A. Feldhoff, W. Yang, J. Caro, *Angew. Chem. Int. Ed.*, 2010, **49**, 548.
- [14] F. Zhang, X. Zou, X. Gao, S. Fan, F. Sun, H. Ren, G. Zhu, *Adv. Funct. Mater.*, 2012, **22**, 3583.
- [15] S. Zhou, X. Zou, F. Sun, H. Ren, J. Liu, F. Zhang, N. Zhao, G. Zhu, *Int. J. Hydrogen Energy*, 2013, **38**, 5338.
- [16] H. Guo, G. Zhu, I. J. Hewitt, S. Qiu, *J. Am. Chem. Soc.*, 2009, **131**, 1646.

- [17] A. Huang, Q. Liu, N. Wang, Y. Zhu, J. Caro, *J. Am. Chem. Soc.*, 2014, **136**, 14686.
- [18] Y. Hu, J. Wei, Y. Liang, H. Zhang, X. Zhang, W. Shen, H. Wang, *Angew. Chem. Int. Ed.*, 2016, **55**, 2048.
- [19] Y. Huang, Y. Xiao, H. Huang, Z. Liu, D. Liu, Q. Yang and C. Zhong, *Chem. Commun.*, 2015, **51**, 17281.
- [20] Y. Peng, Y. Li, Y. Ban, H. Jin, W. Jiao, X. Liu, W. Yang, *Science*, 2014, **346**, 1356.
- [21] D. Wang, Z. Wang, L. Wang, L. Hu, J. Jin, *Nanoscale*, 2015, **7**, 17649.
- [22] M. Yu, H. H. Funke, R. D. Noble, J. L. Falconer, *J. Am. Chem. Soc.*, 2011, **133**, 1748.
- [23] S. N. Wijenayake, N. P. Panapitiya, S. H. Versteeg, C. N. Nguyen, S. Goel, K. J. Balkus, J. I. H. Musselman, J. P. Ferraris, *Ind. Eng. Chem. Res.*, 2013, **52**, 6991.
- [24] T. Yang, Y. Xiao, T. S. Chung, *Energy Environ. Sci.*, 2011, **4**, 4171.
- [25] T. Yang, G. M. Shi, T. S. Chung, *Adv. Energy Mater.*, 2012, **2**, 1358.
- [26] H.W. Kim, H. W. Yoon, S.-M. Yoon, B. M. Yoo, B. K. Ahn, Y. H. Cho, H. J. Shin, H. Yang, U. Paik, S. Kwon, J.-Y. Choi, H. B. Park, *Science*, 2013, **342**, 91.
- [27] J. Shen, G. Liu, K. Huang, Z. Chu, W. Jin, N. Xu, *ACS Nano*, 2016, **10**, 3398.
